# Supplementary material for: From Mindfulness to Non-attachment: A Science Mapping Study of Buddhist Psychology Research
Source: Research Square preprint supplement (doi:10.21203/rs.3.rs-8492804/v1), 2026-02-04
Supplement: Supplementary file 1 [file 2133ba9ba35ba5138d472e36.docx]

**Appendix S.1. Supplementary Descriptive Results**

***S.1.1 Number of publications by year***

Figure S1 reports annual publication output in Buddhist psychology and indicates a pronounced upward trend over time. In the early years, output was sporadic, with the 1980s and 1990s typically registering only one to two publications per year. Growth became more apparent from the mid-2000s and continued steadily throughout the 2010s. The pace of publication accelerated further in recent years, with annual counts reaching double digits by the late 2010s and peaking at 14 publications in 2024, the highest yearly total in the series. Overall, the pattern suggests expanding scholarly attention to Buddhist psychology, with particularly sharp growth during the last five years.

Figure S1. Number of publications over years of Buddhist psychology

***S.1.2. Source of publication***

Table S1 summarizes the leading journals publishing Buddhist psychology research and reports both output and citation impact. Mindfulness is the most prolific venue, with 14 publications, the largest share among all journals, and these articles have accumulated more than 200 citations. This pattern suggests that Mindfulness is not only a frequent outlet but also an influential one in this domain. The next most common outlet is Frontiers in Psychology with seven publications, accompanied by a comparatively high cumulative citation count of roughly 160, indicating substantial impact per article. Other notable sources include Contemporary Buddhism with six publications and Religions and Sophia with four publications each, although these outlets show lower total citation counts. Overall, publication and citation activity is concentrated in a small set of core journals, particularly Mindfulness and Frontiers in Psychology, underscoring their central role in disseminating research on Buddhist psychology.

Table S1. Top 10 journals of Buddhist psychology.

| Journal Name | Number of articles | Citations |
| --- | --- | --- |
| MINDFULNESS | 14 | 217 |
| FRONTIERS IN PSYCHOLOGY | 7 | 161 |
| CONTEMPORARY BUDDHISM | 6 | 9 |
| RELIGIONS | 4 | 2 |
| SOPHIA | 4 | 15 |
| CLINICAL SOCIAL WORK JOURNAL | 3 | 30 |
| MENTAL HEALTH RELIGION CULTURE | 3 | 23 |
| JOURNAL OF HUMANISTIC PSYCHOLOGY | 3 | 8 |
| PASTORAL PSYCHOLOGY | 3 | 16 |
| CURRENT PSYCHOLOGY | 2 | 23 |

***S.1.3. Author and co-authorship analysis***

Figure S2 presents the co-authorship network in the Buddhist psychology literature and illustrates prevailing collaboration patterns. The network is relatively fragmented, with many researchers appearing as isolated nodes, which is consistent with a high proportion of single-authored publications. In this dataset, more than 60 percent of publications are single-authored, indicating that a substantial share of the literature has been produced without co-authors. Even among multi-author papers, collaboration tends to occur within small teams.

One prominent collaboration group centers on A. Maddock, the most prolific author with eight publications, who frequently co-authors with a stable group of collaborators, including D. Hevey, P. D’Alton, and B. Kirby. Other recurring partnerships are also visible, for example, M. Beitel and colleagues such as A. Margolin, although these appear less common. Overall, the field contains identifiable collaborative subgroups, but co-authorship connectivity remains limited, suggesting that many scholars conduct Buddhist psychology research in parallel rather than through extensive inter-group collaboration.


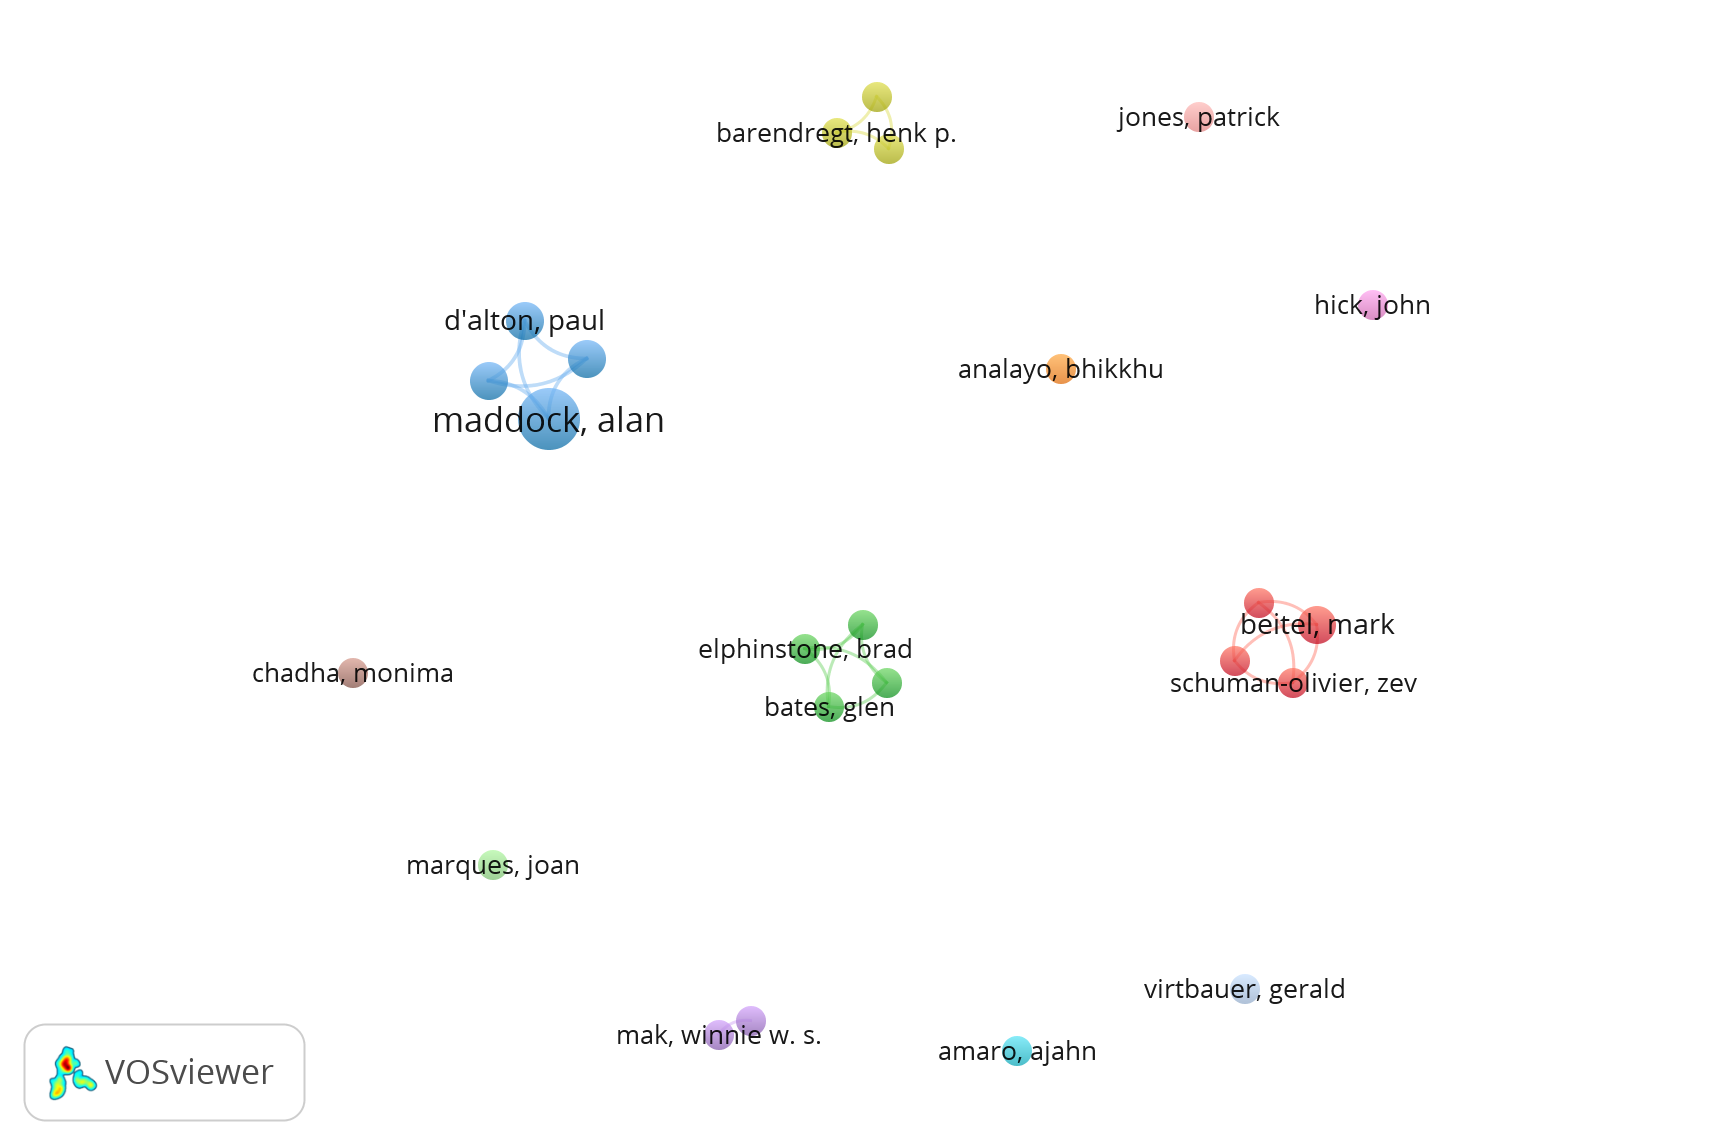


Figure S2. Author collaboration network analysis in Buddhist psychology.

***S.1.4. Affiliation analysis***

Table S2 summarizes the leading contributing institutions and countries in Buddhist psychology research. Sapienza University of Rome is the most productive institution, with six publications. Several universities follow closely, including the California State University system, Trinity College Dublin, and Harvard University, each with five publications. Additional contributors include the University of Haifa, the University of Massachusetts system, and University College Dublin, each with four publications. Overall, these patterns indicate substantial contributions from both European institutions, particularly in Italy and Ireland, and North American institutions, primarily in the United States.

One prominent collaboration group centers on A. Maddock, the most prolific author with eight publications, who frequently co-authors with a stable group of collaborators, including D. Hevey, P. D’Alton, and B. Kirby. Other recurring partnerships are also visible, for example, M. Beitel and colleagues such as A. Margolin, although these appear less common. Overall, the field contains identifiable collaborative subgroups, but co-authorship connectivity remains limited, suggesting that many scholars conduct Buddhist psychology research in parallel rather than through extensive inter-group collaboration.

Table S2. Top 10 organizations with largest number of Buddhist psychology

| Affiliations | Number of articles | Country |
| --- | --- | --- |
| California State University System | 5 | United States |
| Harvard University | 5 | United States |
| Sapienza University Rome | 5 | Italy |
| Trinity College Dublin | 5 | Ireland |
| University College Dublin | 4 | Ireland |
| Chulalongkorn University | 3 | Thailand |
| RCSI University of Medicine And Health Sciences | 3 | Ireland |
| St. Vincent's University Hospital | 3 | Ireland |
| University of California System | 3 | United States |
| University of Massachusetts System | 3 | United States |

***S.1.5. Country/region analysis***

Table S3 and Figure S3 summarize international publication contributions and collaboration patterns by country. The distribution of publications largely mirrors the affiliation results. The United States produces the highest volume of research, followed by contributors such as China, Canada, and a range of European and Asia Pacific countries. Despite this geographic breadth, cross-national collaboration appears limited. Approximately 85 percent of papers are authored by researchers based in a single country, whereas only about 15 percent involve international co-authorship. Consistent with this pattern, the collaboration network in Figure S3 is sparse.

When international collaborations do occur, the United States frequently serves as a central hub connecting to multiple partner countries. The most common bilateral collaborations involve the United States with Australia and the United States with India, each appearing in multiple co-authored publications. Additional links are visible among European and Asian countries, including collaborations involving Italy, India, and the Netherlands. Overall, the field is geographically widespread but characterized by largely country-siloed research output, with modest international collaboration clusters and the strongest ties centered on the United States and its partners.

Table S3. Top 10 countries/regions with most publications in Buddhist psychology.

| Country/Region | Number of articles | Citations |
| --- | --- | --- |
| USA | 68 | 2128 |
| Canada | 12 | 174 |
| China | 12 | 144 |
| Australia | 9 | 123 |
| Ireland | 9 | 79 |
| England | 6 | 961 |
| Thailand | 6 | 377 |
| Italy | 5 | 57 |
| India | 5 | 45 |
| Germany | 4 | 971 |


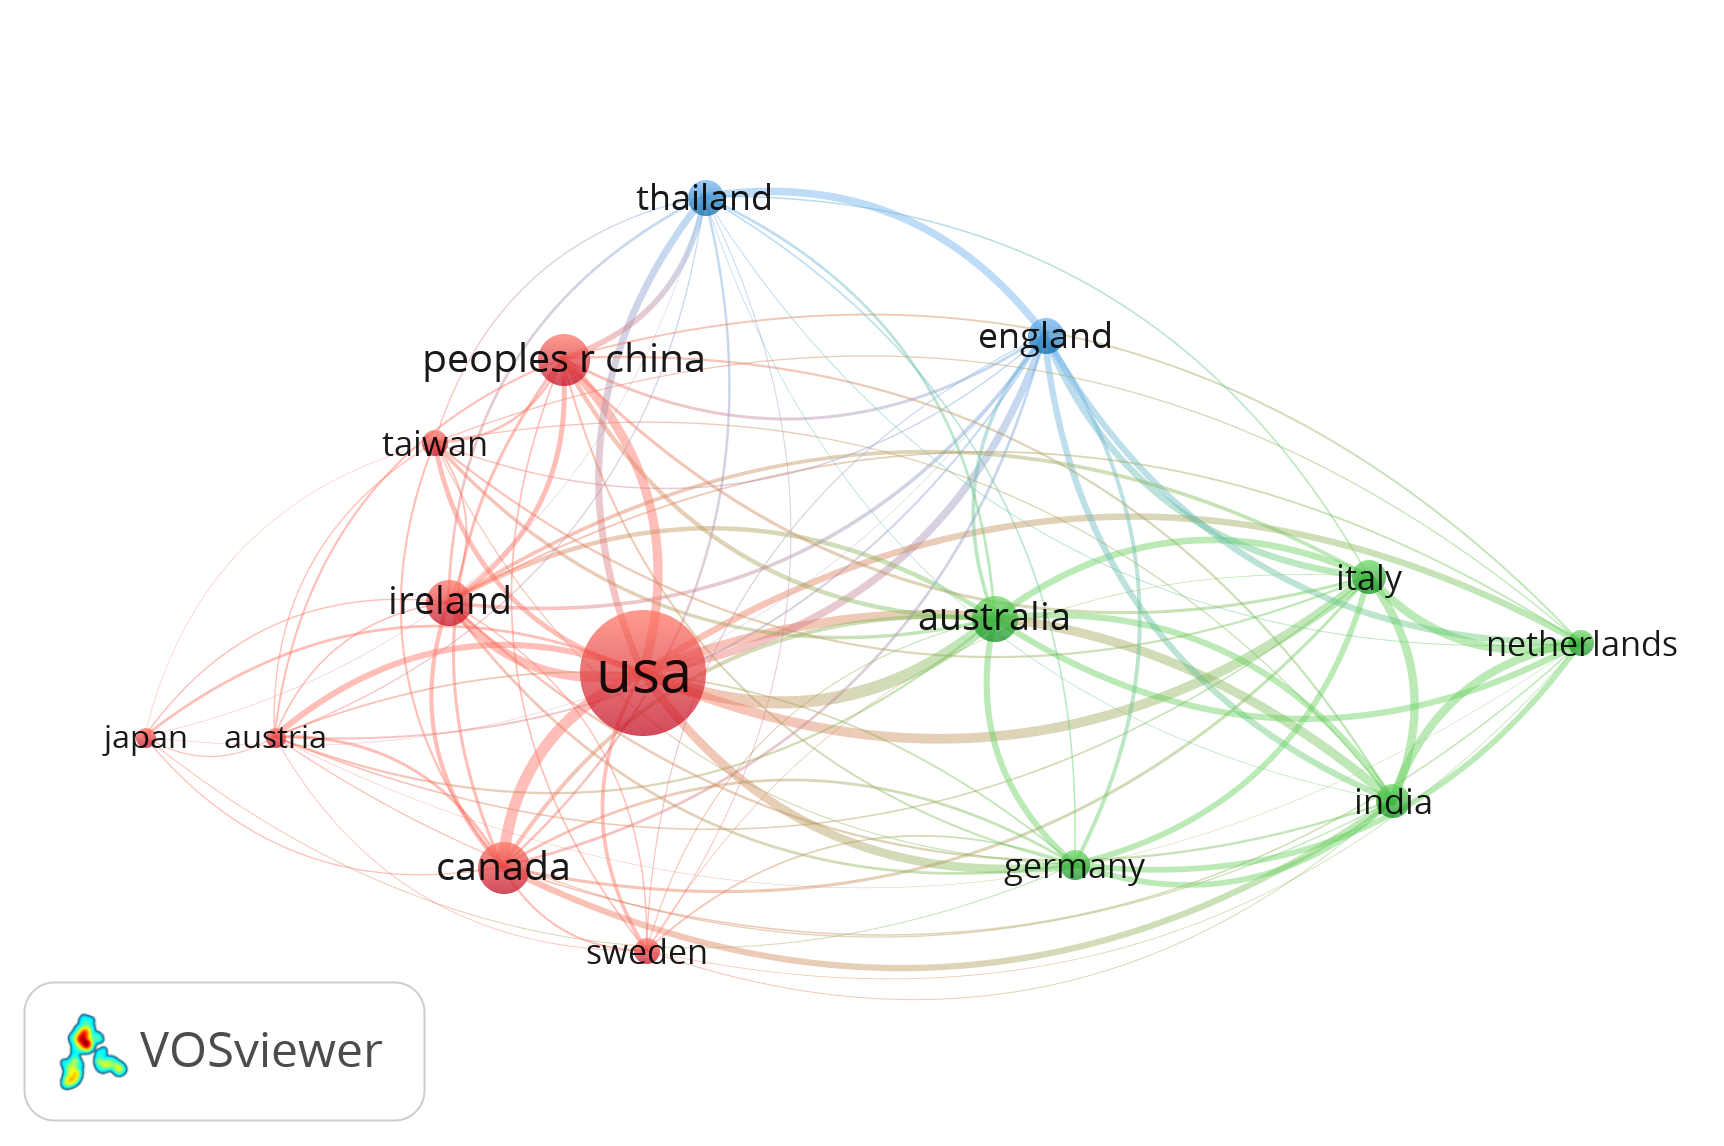


Figure S3. Country collaboration network analysis in Buddhist psychology.

***S.1.6. Co-citation analysis***

Co-citation analysis (Table S4) identifies the authors and works most frequently cited together in the Buddhist psychology literature, thereby clarifying the field’s intellectual foundations. The results indicate that a small set of seminal sources, largely focused on mindfulness and closely related constructs, functions as shared reference points across many publications. Segal et al. (2002), which introduced Mindfulness-Based Cognitive Therapy for depression, is the most frequently co-cited work and appears in 17 article reference lists. Several other foundational sources follow closely. Wallace (2006), which integrates Buddhist contemplative perspectives with psychological inquiry, is cited by 16 publications, and Bishop et al. (2004), a widely referenced definitional treatment of mindfulness, is cited by 14 publications. Brown and Ryan (2003), which introduced the Mindful Attention Awareness Scale, and Baer et al. (2006), which examined facets of mindfulness, each appear in approximately a dozen references. Classic and practitioner-oriented texts also remain visible, including Kabat-Zinn’s Full Catastrophe Living (1990), which is co-cited in about nine publications, underscoring its sustained influence.

At the author level, these co-citation patterns indicate that figures such as Jon Kabat-Zinn, Zindel Segal, B. Alan Wallace, and other early architects of mindfulness research, including Bishop, Brown, and Baer, constitute a central influence in this literature. The co-citation network (Figure S4) further visualizes how these and related sources cluster into distinct knowledge domains. One dominant cluster centers on mindfulness-based interventions and measurement, linking works by Kabat-Zinn, Segal, Bishop, Brown, and Baer in a dense structure consistent with the core literature on mindfulness in therapy and assessment. A second cluster reflects Buddhist philosophical and contemplative scholarship, highlighted by authors such as Wallace and others who translate traditional Buddhist insights into concepts legible within contemporary psychology. A smaller cluster appears to focus on compassion and self-related constructs, including co-citations of self-compassion scholarship, such as Neff’s work, and nonattachment research, such as contributions by Sahdra and Shaver. Overall, the co-citation structure suggests that Buddhist psychology research draws primarily on three interrelated knowledge streams: mindfulness-based clinical and measurement research, Buddhist philosophical and contemplative foundations, and compassion and self-related approaches that extend the field beyond attention training alone.

Table S4. Top 10 authors and articles cited in Buddhist psychology

| Author | Citations | Article | Citations |
| --- | --- | --- | --- |
| Jon Kabat-Zinn | 61 | Elliston (2002) | 17 |
| Kristin Neff | 43 | Wallace and Shapiro (2006) | 16 |
| Alan Maddock | 35 | Sahdra et al. (2010) | 15 |
| Carl Jung | 35 | Bishop (2004) | 14 |
| Ruth Baer | 32 | Brown and Ryan (2003) | 13 |
| Edo Shonin | 32 | Baer et al. (2006) | 12 |
| Wallace, B. Alan | 30 | Hölzel et al. (2011) | 12 |
| Steven C. Hayes | 28 | Shonin et al. (2014) | 12 |
| Kirk Warren Brown | 26 | Grabovac et al. (2011) | 10 |
| Bhikkhu Bodhi | 26 | Hu and Bentler (1999) | 9 |

**
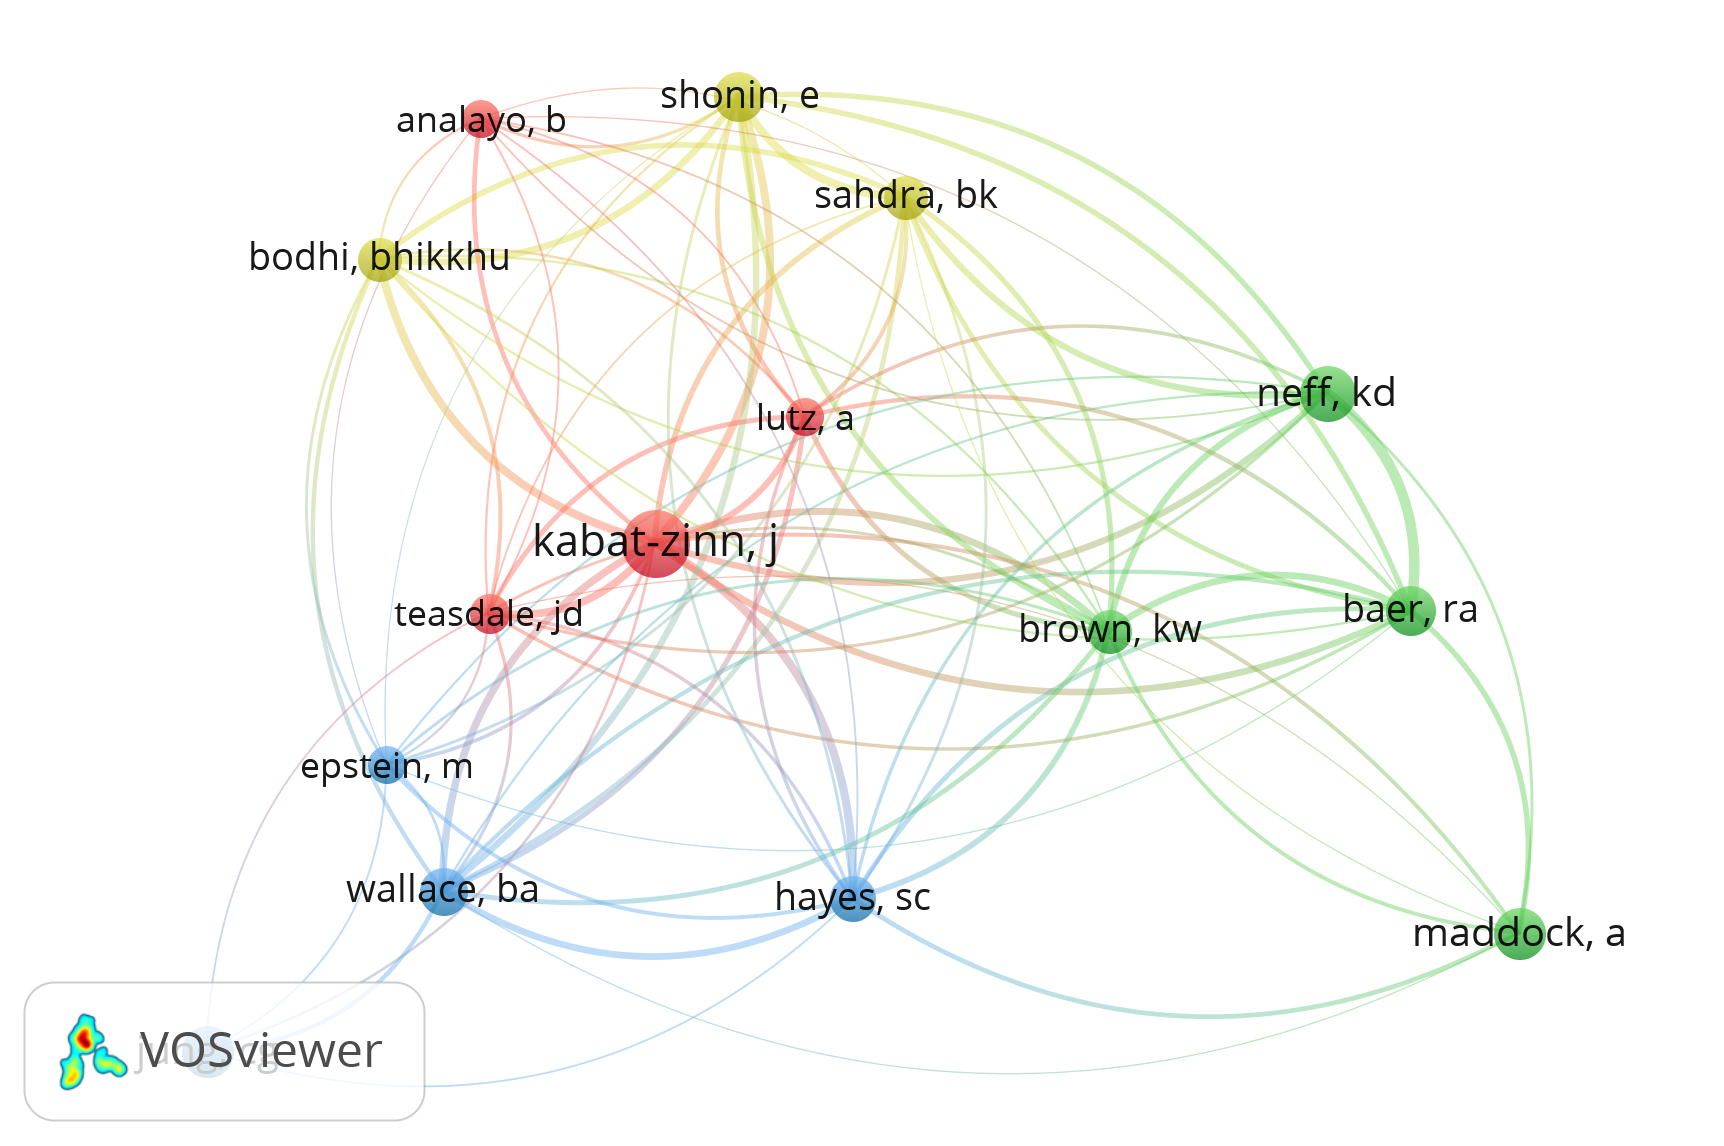
**

Figure S4. Cited author co-citation clustered analysis in Buddhist psychology

**References**

Baer, R. A., Smith, G. T., Hopkins, J., Krietemeyer, J., & Toney, L. (2006). Using Self-Report assessment methods to explore facets of mindfulness. *Assessment*, *13*(1), 27–45. https://doi.org/10.1177/1073191105283504

Bishop, S. R. (2004). Mindfulness: a Proposed Operational definition. *Clinical Psychology Science and Practice*, *11*(3), 230–241. https://doi.org/10.1093/clipsy/bph077

Brown, K. W., & Ryan, R. M. (2003). The benefits of being present: Mindfulness and its role in psychological well-being. *Journal of Personality and Social Psychology*, *84*(4), 822–848. https://doi.org/10.1037/0022-3514.84.4.822

Elliston, P. (2002). Mindfulness‐based cognitive therapy for depression. A new approach to preventing relapse. Zindel Segal, J. Mark Williams &amp; John Teasdale, 2002 The Guilford Press, New York ISBN 1‐57230‐706‐4. *Spirituality and Health International*, *3*(2), 53–54. https://doi.org/10.1002/shi.90

Grabovac, A. D., Lau, M. A., & Willett, B. R. (2011). Mechanisms of Mindfulness: a Buddhist Psychological model. *Mindfulness*, *2*(3), 154–166. https://doi.org/10.1007/s12671-011-0054-5

Hölzel, B. K., Lazar, S. W., Gard, T., Schuman-Olivier, Z., Vago, D. R., & Ott, U. (2011). How does mindfulness meditation work? Proposing mechanisms of action from a conceptual and neural perspective. *Perspectives on Psychological Science*, *6*(6), 537–559. https://doi.org/10.1177/1745691611419671

Hu, L., & Bentler, P. M. (1999). Cutoff criteria for fit indexes in covariance structure analysis: Conventional criteria versus new alternatives. *Structural Equation Modeling a Multidisciplinary Journal*, *6*(1), 1–55. https://doi.org/10.1080/10705519909540118

Sahdra, B. K., Shaver, P. R., & Brown, K. W. (2010). A scale to measure nonattachment: a Buddhist complement to Western research on attachment and adaptive functioning. *Journal of Personality Assessment*, *92*(2), 116–127. https://doi.org/10.1080/00223890903425960

Shonin, E., Van Gordon, W., & Griffiths, M. D. (2014). The emerging role of Buddhism in clinical psychology: Toward effective integration. *Psychology of Religion and Spirituality*, *6*(2), 123–137. https://doi.org/10.1037/a0035859

Wallace, B. A., & Shapiro, S. L. (2006). Mental balance and well-being: Building bridges between Buddhism and Western psychology. *American Psychologist*, *61*(7), 690–701. https://doi.org/10.1037/0003-066x.61.7.690
